# Supplementary material
Source: PubMed Central journal article supplement (PMC6810650)
Supplement: NIHMS1521589-supplement-9.pdf [file NIHMS1521589-supplement-9.pdf]

**TABLE S4:** Transgenic Plant and T-DNA Insertion Lines Used in This Study; Related to STAR Methods.

A: Transgenic Plant Lines

| Genotype <sup>a</sup>                            | Construct type | Transformation vector <sup>b</sup> | Ecotype | Antibiotic resistance | Reference <sup>c</sup>       |
|--------------------------------------------------|----------------|------------------------------------|---------|-----------------------|------------------------------|
| <i>35S::GFP</i>                                  | cDNA           | pKGWFS7                            | Ws      | Kanamycin             | Provided by Lucia C. Strader |
| <i>35S::GFP-PUX7</i>                             | cDNA           | pMDC43                             | Ws      | Hygromycin            | 1                            |
| <i>35S::GFP-ATG8a</i>                            | cDNA           | pEGAD                              | Col-0   | BASTA                 | 2                            |
| <i>UBQ10::mCherry-ATG8a</i>                      | cDNA           | pMDC99                             | Col-0   | Hygromycin            | 3                            |
| <i>cdc48a-1 CDC48a::YFP-CDC48a</i>               | Genomic        | pPZP211                            | Col-2   | Kanamycin             | 4                            |
| <i>35S::alcR alcA::H6T7-CDC48a</i>               | cDNA           | pPZP211                            | Col-2   | Kanamycin             | 4                            |
| <i>35S::alcR alcA::H6T7-CDC48a (E308Q E581Q)</i> | cDNA           | pPZP211                            | Col-2   | Kanamycin             | 4                            |

<sup>a</sup> All constructs were transformed into the indicated ecotype via the floral dip method (Clough and Bent, 1998).

<sup>b</sup> Plant transformation vectors are described in: Karimi *et al.*, 2002 (pKGWFS7); Curtis and Grossniklaus, 2003 (pMDC43 and pMDC99); Cutler *et al.*, 2000 (pEGAD); Hajdukiewicz *et al.*, 1994 (pPZP211).

<sup>c</sup> References are: 1. Gallois *et al.*, 2013; 2. Thompson *et al.*, 2005; 3. Suttangkakul *et al.*, 2011; 4. Park *et al.*, 2008.

B: T-DNA Insertion Lines

| Gene name     | Locus <sup>a</sup> | Line name       | Line ID <sup>b</sup> | Insertion site <sup>c</sup> | Ecotype <sup>d</sup> | Reference <sup>e</sup> |
|---------------|--------------------|-----------------|----------------------|-----------------------------|----------------------|------------------------|
| <i>ATG7</i>   | At5g45900          | <i>atg7-2</i>   | GABI_655_B06         | 7 <sup>th</sup> exon        | Col-0                | 1                      |
| <i>ATG10</i>  | At3g07525          | <i>atg10-1</i>  | SALK_084434          | 4 <sup>th</sup> exon        | Col-0                | 2                      |
| <i>ATG13a</i> | At3g49590          | <i>atg13a-2</i> | SALK_044831          | 1 <sup>st</sup> exon        | Col-0                | 3                      |
| <i>ATG13b</i> | At3g18770          | <i>atg13b-2</i> | GABI_501_F06         | 2 <sup>nd</sup> intron      | Col-0                | 3                      |
| <i>CDC48a</i> | At3g09840          | <i>cdc48a-1</i> | SALK_064573          | 1 <sup>st</sup> intron      | Col-0                | 4                      |

|              |           |                |                      |                        |       |            |
|--------------|-----------|----------------|----------------------|------------------------|-------|------------|
| <i>PUX7</i>  | At1g14570 | <i>pux7-1</i>  | FLAG_585C03          | 1 <sup>st</sup> intron | Ws    | 5          |
|              |           | <i>pux7-2</i>  | WiscDsLox_481_484J16 | 7 <sup>th</sup> exon   | Col-0 | This study |
|              |           | <i>pux7-3</i>  | SAIL_386_G09         | 3'-UTR                 | Col-3 | This study |
|              |           | <i>pux7-4</i>  | SAIL_14_A08          | 3'-UTR                 | Col-3 | This study |
|              |           | <i>pux7-5</i>  | WiscDsLox_474F01     | 3'-UTR                 | Col-0 | This study |
| <i>PUX8</i>  | At4g11740 | <i>pux8-1</i>  | SALK_109655          | 1 <sup>st</sup> intron | Col-0 | This study |
|              |           | <i>pux8-2</i>  | SALK_014680          | 3 <sup>rd</sup> exon   | Col-0 | This study |
|              |           | <i>pux8-3</i>  | SALK_014872          | N/D                    | Col-0 | This study |
|              |           | <i>pux8-4</i>  | FLAG_148D05          | 7 <sup>th</sup> exon   | Ws    | This study |
|              |           | <i>pux8-5</i>  | FLAG_208G07          | N/D                    | Ws    | This study |
|              |           | <i>pux8-6</i>  | SALK_131668          | 8 <sup>th</sup> intron | Col-0 | This study |
| <i>PUX9</i>  | At4g00752 | <i>pux9-1</i>  | SAIL_601_D06         | N/D                    | Col-3 | This study |
|              |           | <i>pux9-2</i>  | FLAG_145D06          | 3 <sup>rd</sup> exon   | Ws    | This study |
|              |           | <i>pux9-3</i>  | SALK_108534          | N/D                    | Col-0 | This study |
|              |           | <i>pux9-4</i>  | SALK_108536          | 7 <sup>th</sup> intron | Col-0 | This study |
| <i>PUX13</i> | At4g23040 | <i>pux13-1</i> | FLAG_379C08          | 5'-UTR                 | Ws    | This study |
|              |           | <i>pux13-2</i> | SALK_044544          | 1 <sup>st</sup> intron | Col-0 | This study |
|              |           | <i>pux13-3</i> | WiscDsLox_383B7      | 1 <sup>st</sup> intron | Col-0 | This study |

<sup>a</sup> Locus identifiers are taken from the Arabidopsis Information Resource ([www.arabidopsis.org](http://www.arabidopsis.org)).

<sup>b</sup> T-DNA collections are described in: O'Malley *et al.*, 2015 (GABI-Kat, SALK, SAIL, and WiscDsLox); Bechtold *et al.*, 1993 (FLAG).

<sup>c</sup> N/D, insertion not detected.

<sup>d</sup> Lines were backcrossed at least twice to the respective wild type before analysis.

<sup>e</sup> References are 1. Hofius *et al.*, 2009; 2. Phillips *et al.*, 2008; 3. Suttangkakul *et al.*, 2011; 4. Park *et al.*, 2008; 5. Gallois *et al.*, 2013.
